# Supplementary material for: Synthesis, characterisation and self-assembly behaviour of emissive surfactant–ruthenium(ii) complexes
Source: Royal Society of Chemistry journal article supplement (doi:10.1039/c7nj02698f), 2017-01-01
Supplement: c7nj02698f1.pdf [file c7nj02698f1.pdf]

## Electronic Supplementary Information (ESI) - New Journal of Chemistry

### Synthesis, characterisation and self-assembly behaviour of emissive surfactant–ruthenium(II) complexes

Selvan Nehru,<sup>a</sup> Selvakumar Veeralakshmi<sup>b</sup> and Sankaralingam Arunachalam<sup>\*c</sup>

<sup>a</sup>Department of Physical Chemistry, School of Chemical Sciences, University of Madras, Guindy Campus, Chennai 600025, Tamilnadu, India.

<sup>b</sup>Department of Applied Science and Technology, Anna University, Guindy Campus, Chennai 600025, Tamilnadu, India.

<sup>c</sup>School of Chemistry, Bharathidasan University, Tiruchirappalli 620024, Tamilnadu, India.

\*Corresponding author e-mail: arunasurf@yahoo.com

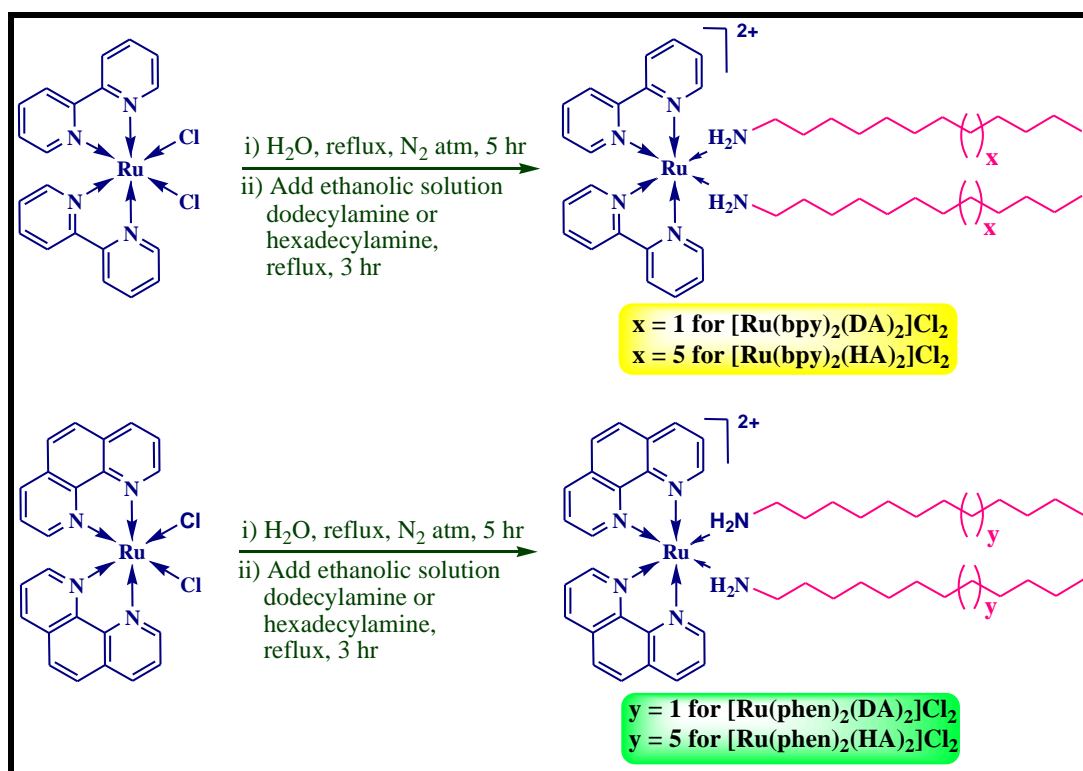

**Scheme S1.** Schematic representation of synthesis of double chain surfactant–ruthenium(II) complexes.

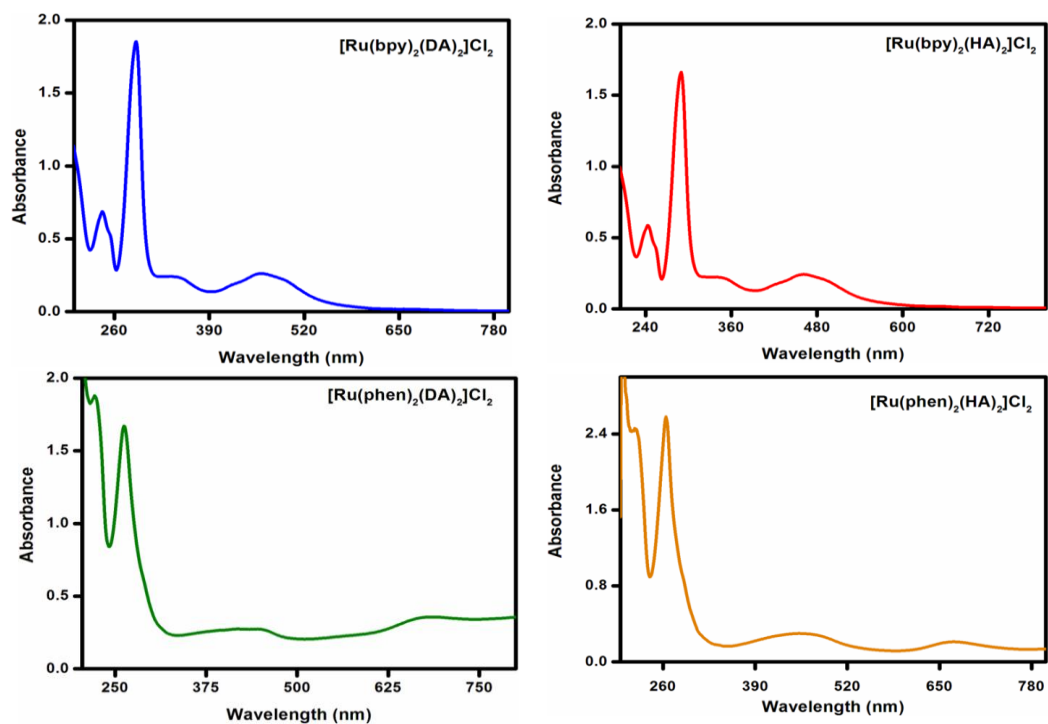

**Fig.S1.** UV-visible absorption spectra of complexes 1–4 (10  $\mu\text{M}$ ) in aqueous medium.

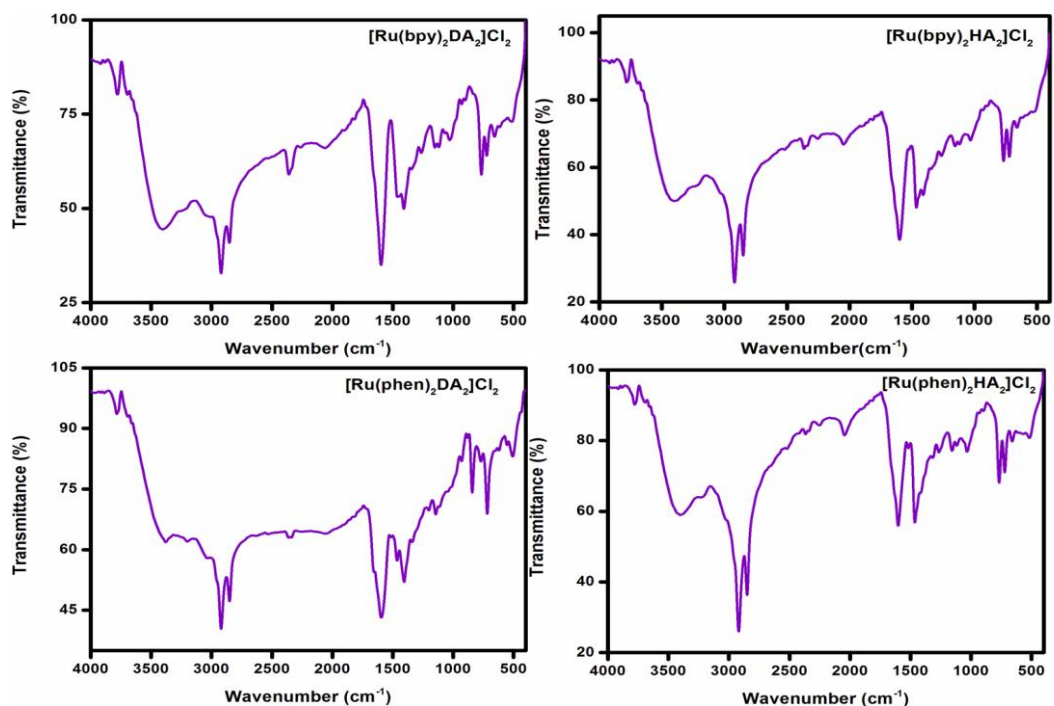

**Fig.S2.** FT-IR spectra of the complexes 1–4.

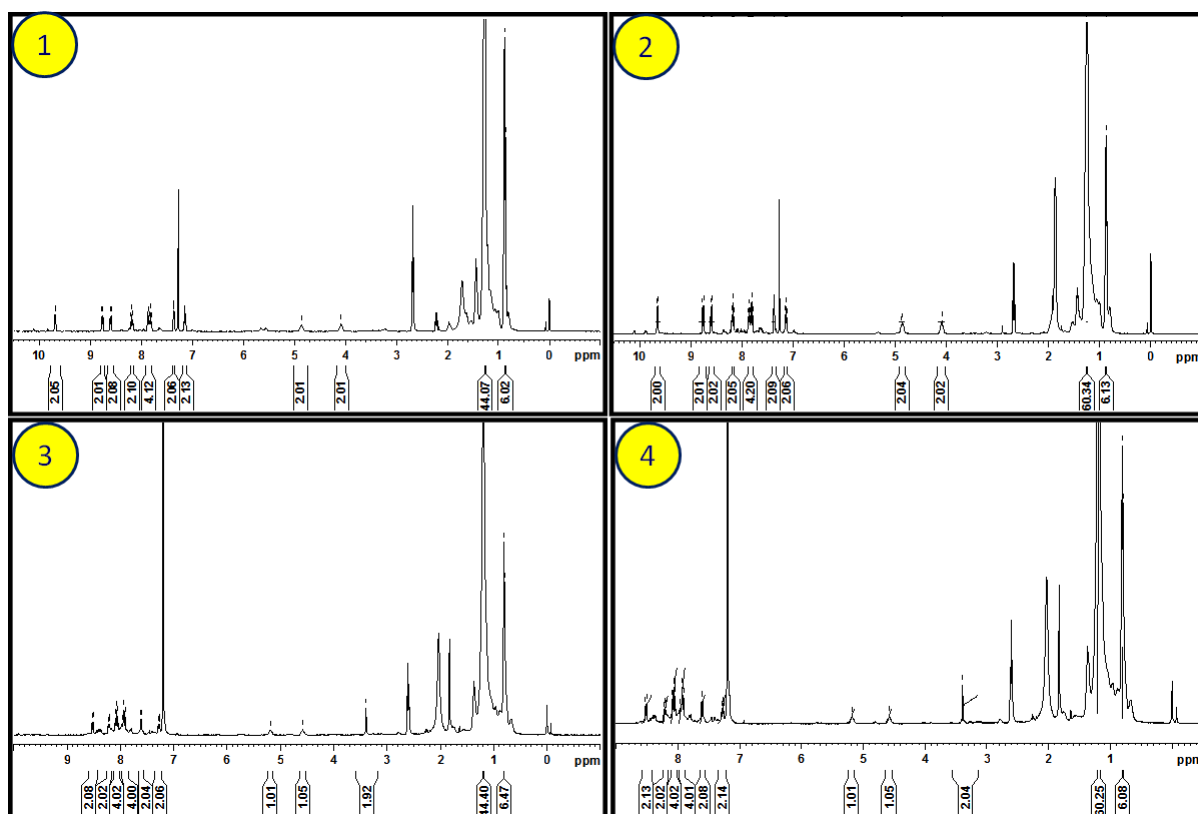

**Fig.S3.**  $^1\text{H-NMR}$  spectra of complexes **1-4** in  $\text{CDCl}_3$ .

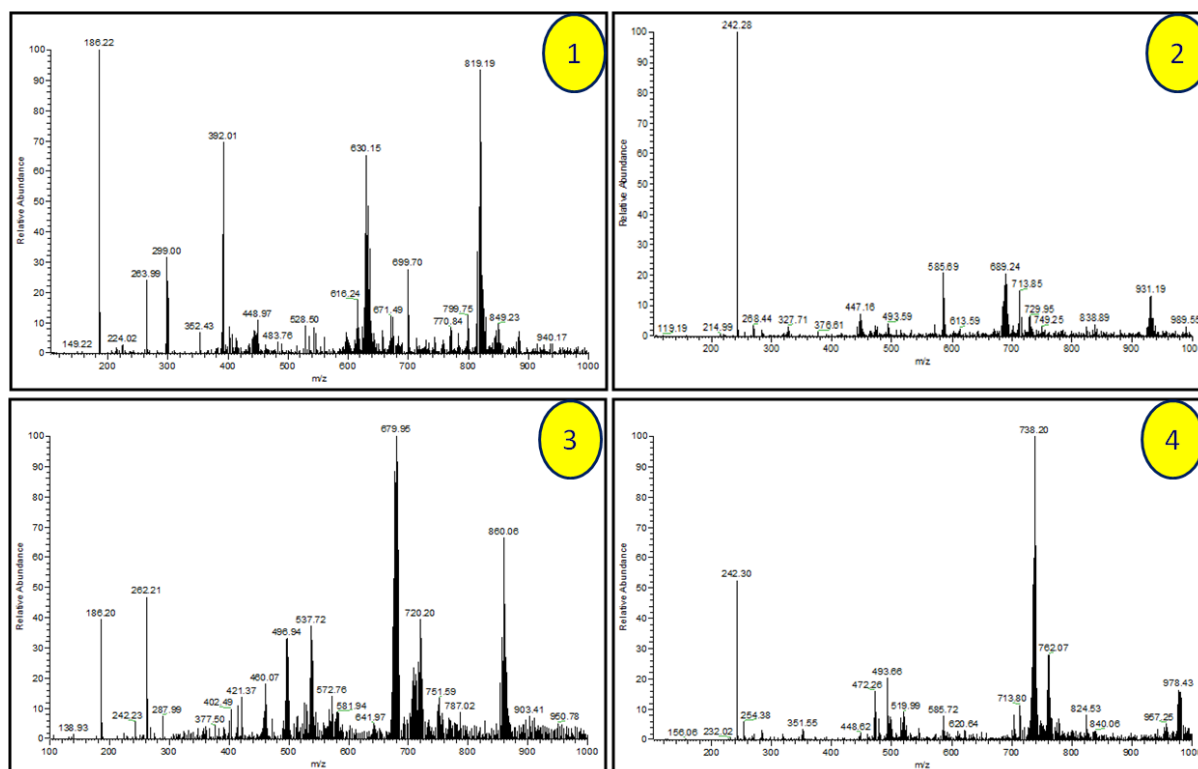

**Fig. S4** ESI-mass spectra of complexes **1-4** in methanol.

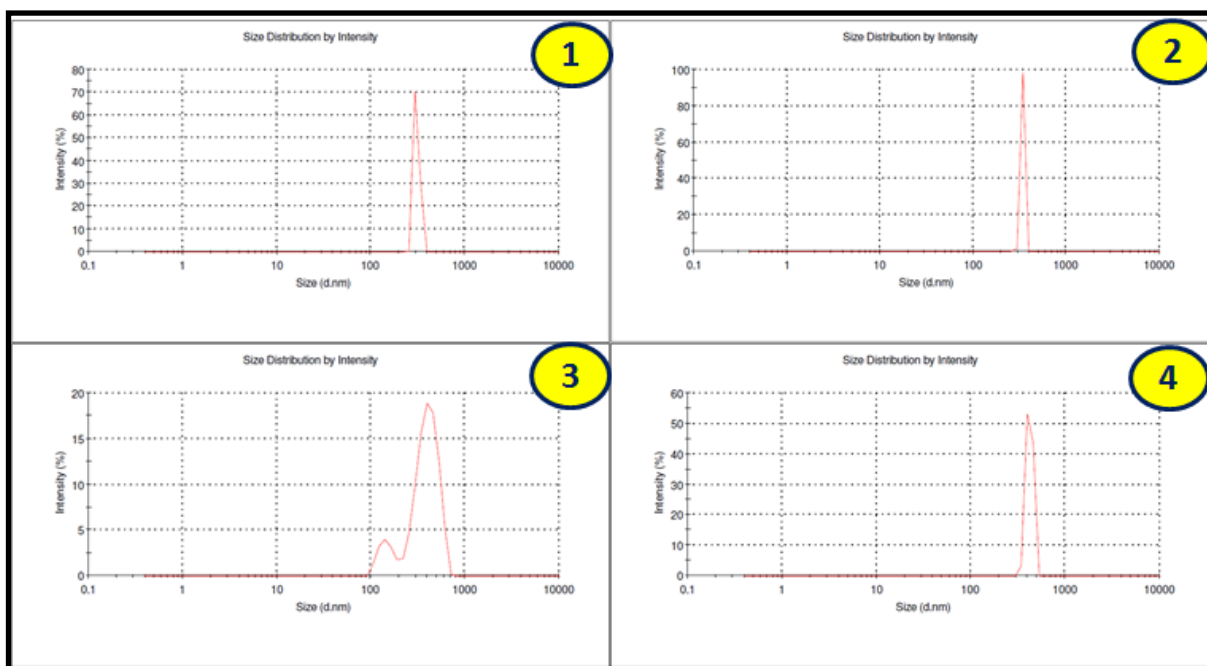

Fig.S5. DLS measurements for the complexes 1-4 (10  $\mu\text{M}$ ) in aqueous medium.

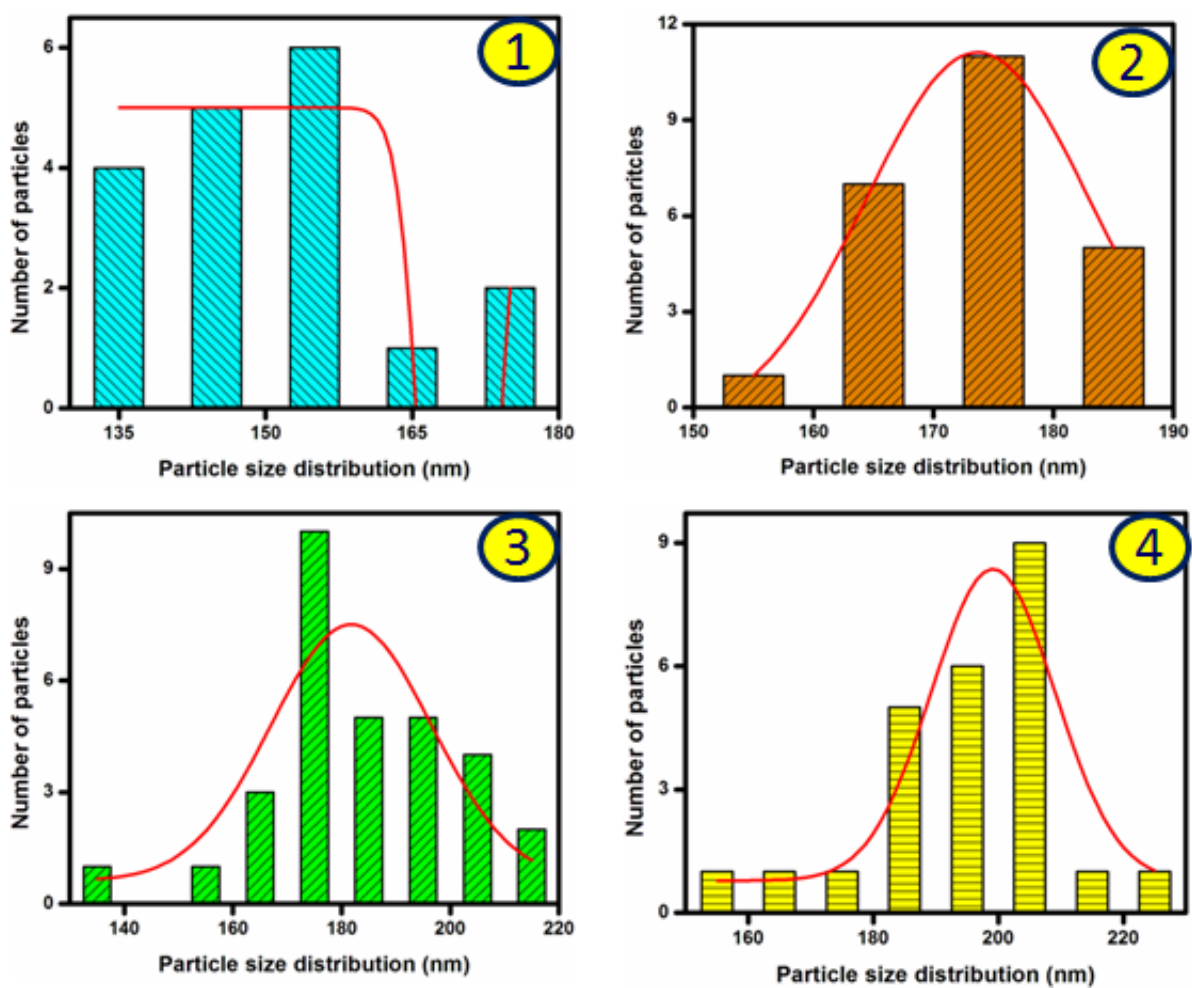

Fig. S6. Size distribution histogram plot from the FESEM images for the complexes 1-4.

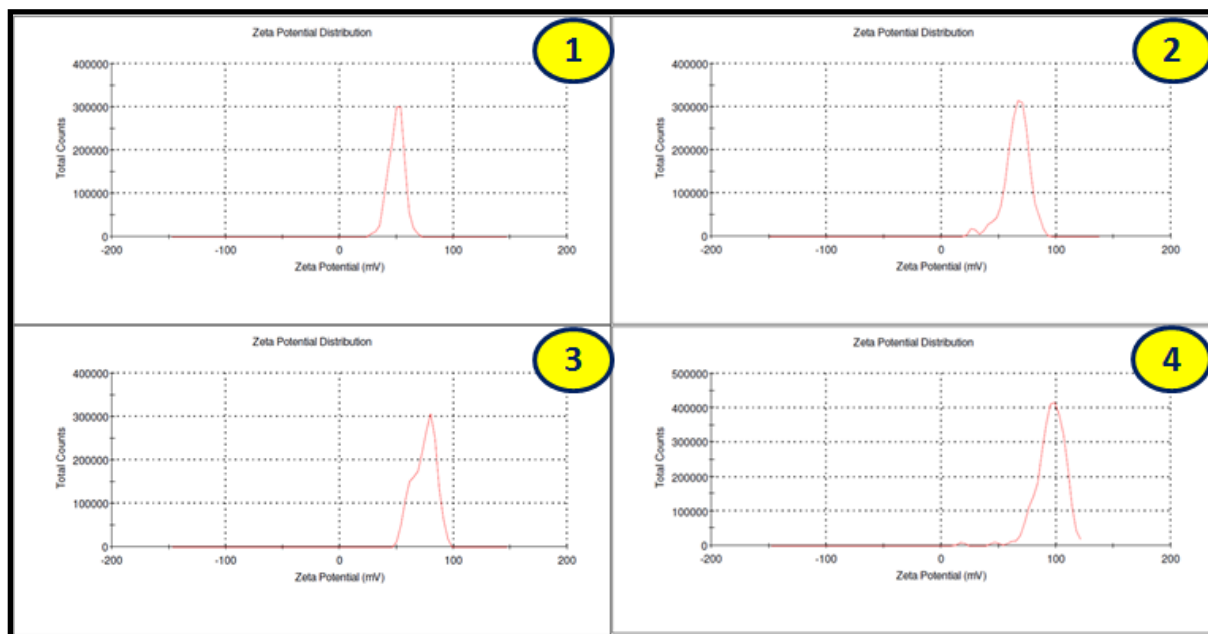

Fig.S7. Zeta potential measurements for the complexes 1–4 (10  $\mu\text{M}$ ) in aqueous medium.

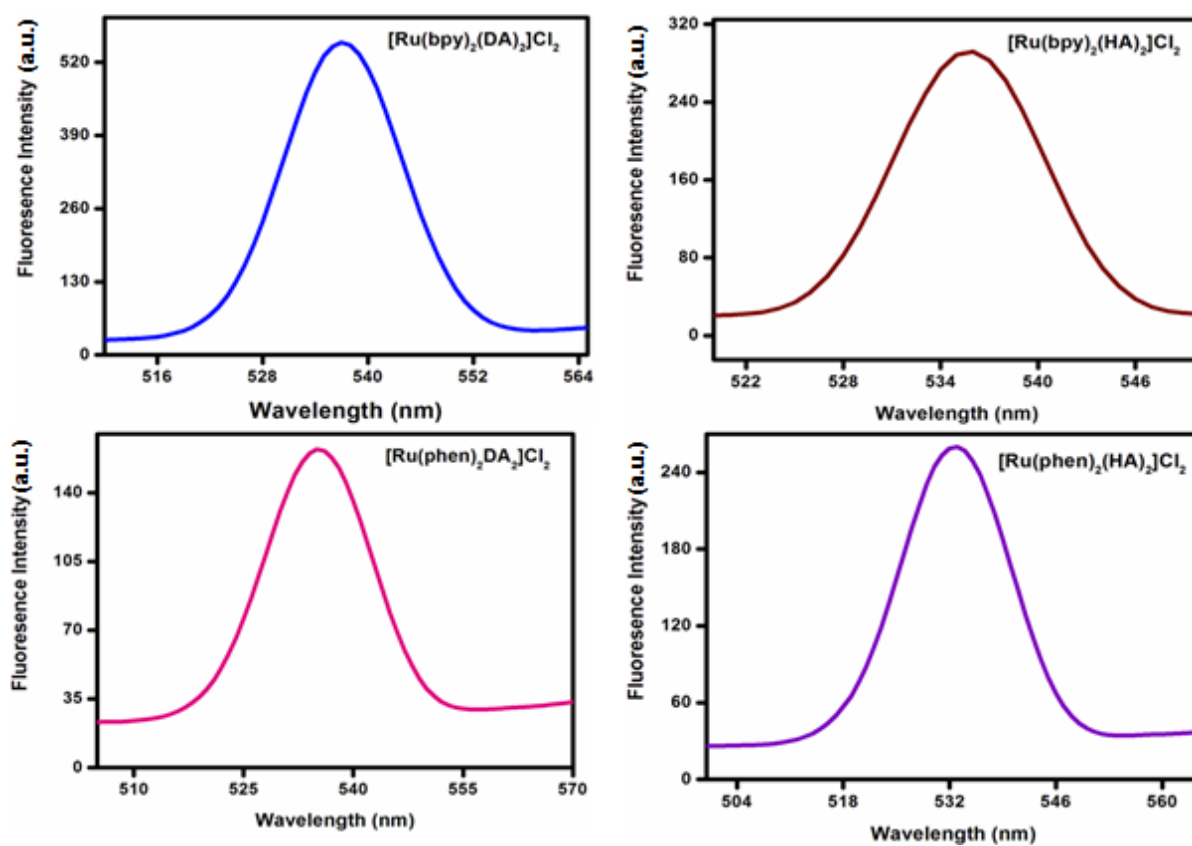

Fig.S8. Emission spectra of complexes 1 – 4 (50  $\mu\text{M}$ ) in aqueous medium at 298 K.
